# Supplementary material for: Effects of Arbuscular mycorrhizal fungi and soil substrate on invasive plant Alternanthera philoxeroides
Source: Research Square preprint supplement (doi:10.21203/rs.3.rs-5654047/v1), 2025-04-15
Supplement: Supplementary file 1 [file 87afc037e57e30955323f15a.docx]

Table S1 Effects of AM fungi (a and b) on the infection and mycorrhizal dependency of Alternanthera philoxeroides (%)

| type | a infection | AM fungi a infection | a Mycorrhizal dependency | b Mycorrhizal dependency |
| --- | --- | --- | --- | --- |
| Soil treatment | 23.78 ± 12.83 | 13.44 ± 7.06 | 21.95 ± 0.30 | 37.21 ± 0.32 |
| Cow manure | 31.31 ± 11.64 | 6.83 ± 4.70 | 8.96 ± 0.46 | 6.09 ± 0.37 |
| Vermicompost | 20.67 ± 11.17 | 5.89 ± 3.57 | 9.71 ± 0.45 | 25.05 ± 0.44 |
| Mix manure | 18.61 ± 7.50 | 7.39 ± 5.35 | 21.41 ± 0.44 | 24.80 ± 0.33 |

(a: AM fungi a; b :AM fungi b).

Table S2 The effect of different growth substrates and treatment with AM fungi (strain a and b) on chlorophyll content in Alternanthera philoxeroides[abbreviation: Chl a:chlorophyll a; Chl b:chlorophyll b; Car: carotene](mg/g)

| type |  | Chl a |  |  | Chl b |  |  | Car |  |
| --- | --- | --- | --- | --- | --- | --- | --- | --- | --- |
|  | Ck | AM fungi a | AM fungi b | Ck | AM fungi a | AM fungi b | Ck | AM fungi a | AM fungi b |
| Soil treatment | 0.92±0.18 | 0.77 ± 0.1 | 0.84 ± 0.1 | 0.33 ± 0.06 | 0.28±0.05 | 0.31±0.04 | 1.02±0.19 | 0.94± 0.12 | 0.99± 0.07 |
| Cow manure | 0.89±0.13 | 0.78±0.14 | 1.01±0.17 | 0.34±0.05 | 0.3±0.05 | 0.41±0.09 | 0.92 ±0.35 | 0.95±0.15 | 1.01±0.13 |
| Vermicompost | 0.92 ± 0.16 | 0.87 ± 0.13 | 0.94 ± 0.08 | 0.34 ± 0.06 | 0.32 ± 0.05 | 0.38 ± 0.04 | 1.05 ± 0.15 | 1 ± 0.12 | 1.04 ± 0.06 |
| Mix manure | 0.98 ± 0.22 | 0.94 ± 0.1 | 0.99 ± 0.16 | 0.37 ± 0.1 | 0.35 ± 0.04 | 0.38 ± 0.07 | 1.11 ± 0.21 | 1.07 ± 0.1 | 1.07 ± 0.12 |

Table S3 Length of Alternanthera philoxeroides treated with AM fungi(a and b) under different substrates treatment (cm)

| Soil treatment | 42.68±1.89 | 43.49±1.99 | 39.89±4.15 |
| --- | --- | --- | --- |
| Cow manure | 44.33±2.92 | 49.23±2.80 | 46.79±2.07 |
| Vermicompost | 46.38±2.90 | 48.52±2.84 | 47.20±2.12 |
| Mix manure | 52.17±1.62 | 51.60±1.74 | 50.03±1.46 |

Table S4 Effects of AM fungi and different substrates on root character of Alternanthera philoxeroides

| |  | Root length(cm) | | | |  | root mass (g/plant) | | | | | | --- | --- | --- | --- | --- | --- | --- | --- | --- | --- | --- | |  | ck | AM Fungi a | % | AM Fungi b | % | ck | AM Fungi a | % | AM Fungi b | % | | Soil treatment | 4.78±0.35 | 5.94±0.54 | 24.27 | 5.30±0.31 | 10.87 | 0.18±0.03 | 0.29±0.02 | 37.93 | 0.33±0.03 | 83.3 | | Cow manure | 6.73±0.51 | 5.92±0.39 | -12.04 | 6.74±0.55 | 0.15 | 0.19±0.04 | 0.25±0.05 | 31.58 | 0.26±0.04 | 26.92 | | Vermicompost | 5.79±0.24 | 5.28±0.30 | -8.81 | 6.39±0.53 | 10.36 | 0.20±0.03 | 0.27±0.03 | 25.92 | 0.28±0.03 | 40.00 | | Mix manure | 6.09±0.58 | 6.29±0.69 | 3.28 | 6.13±0.44 | 0.66 | 0.23±0.03 | 0.26±0.02 | 11.54 | 0.23±0.04 | 0.00 | |
| --- | --- | --- | --- | --- | --- | --- | --- | --- | --- | --- | --- | --- | --- | --- | --- | --- | --- | --- | --- | --- | --- | --- | --- | --- | --- | --- | --- | --- | --- | --- | --- | --- | --- | --- | --- | --- | --- | --- | --- | --- | --- | --- | --- | --- | --- | --- | --- | --- | --- | --- | --- | --- | --- | --- | --- | --- | --- | --- | --- | --- | --- | --- | --- | --- | --- | --- |

Table S5 Effects of AM fungi and different substrates on leaf character of Alternanthera philoxeroides

|  | Number of leaves | | | Area of leaves(mm2/plant) | | |
| --- | --- | --- | --- | --- | --- | --- |
|  | ck | AM Fungi a | AM Fungi b | ck | AM Fungi a | AM Fungi b |
| Soil treatment | 12.75±0.96 | 13.38±0.73 | 14.00±0.96 | 3780.30±543.94 | 4993.97±311.46 | 5681.93±370.40 |
| Cow manure | 13.75±1.22 | 15.00±0.29 | 14.44±0.41 | 5116.35±803.95 | 5317.27±456.38 | 5531.63±388.02 |
| Vermicompost | 14.56±0.93 | 14.22±0.72 | 15.89±0.56 | 4661.84±540.99 | 5310.81±558.05 | 6164.90±399.74 |
| Mix manure | 15.56±0.71 | 16.33±0.71 | 16.56±0.63 | 5092.81±449.79 | 5687.47±336.89 | 5429.34±816.66 |

TableS 6 AM fungi (strain a and strain b) on the biomass of Alternanthera philoxeroides under different substrates

|  |  | Aboveground | biomass |  |  |  | Total | biomass |  |  |
| --- | --- | --- | --- | --- | --- | --- | --- | --- | --- | --- |
|  | CK | AM Fungi a | % | AM Fungi b | % | CK | AM Fungi a | % | AM Fungi b | % |
| Soil treatment | 2.27±0.23 | 2.70±0.18 | 18.90 | 3.03±0.24 | 33.48 | 2.45±0.24 | 2.99±0.17 | 22.04 | 3.36±0.26 | 12.38 |
| Cow manure | 2.76±0.33 | 2.97±0.25 | 7.61 | 2.88±0.21 | 4.35 | 2.95±0.36 | 3.22±0.28 | 6.16 | 3.13±0.24 | 6.10 |
| Vermicompost | 2.75±0.28 | 2.96±0.31 | 7.64 | 3.40±0.26 | 23.64 | 2.94±0.30 | 3.23±0.33 | 9.87 | 3.68±0.28 | 25.17 |
| Mix manure | 2.69±0.37 | 3.28±0.19 | 21.93 | 3.41±0.22 | 26.77 | 2.92±0.39 | 3.54±0.20 | 21.23 | 3.64±0.26 | 24.65 |

Table S7 Shapiro-Wilk test statistics across treatments

|  |  | Statistic (W) | df | Sig. | Normality? |
| --- | --- | --- | --- | --- | --- |
| Chla | Soil treatment | .951 | 27 | .239 | Yes |
| Cow manure | .950 | 27 | .230 | Yes |
| Vermicompost | .969 | 27 | .600 | Yes |
| Mix manure | .943 | 27 | .145 | Yes |
| Chlb | Soil treatment | .970 | 27 | .623 | Yes |
| Cow manure | .904 | 27 | .019 | No |
| Vermicompost | .953 | 27 | .270 | Yes |
| Mix manure | .967 | 27 | .527 | Yes |
| Car | Soil treatment | .966 | 27 | .524 | Yes |
| Cow manure | .755 | 27 | .000 | No |
| Vermicompost | .956 | 27 | .319 | Yes |
| Mix manure | .946 | 27 | .168 | Yes |
| Plant height | Soil treatment | .863 | 27 | .003 | No |
| Cow manure | .982 | 27 | .910 | Yes |
| Vermicompost | .965 | 27 | .494 | Yes |
| Mix manure | .956 | 27 | .307 | Yes |
| Leaf number | Soil treatment | .955 | 27 | .308 | Yes |
| Cow manure | .936 | 27 | .106 | Yes |
| Vermicompost | .928 | 27 | .070 | Yes |
| Mix manure | .966 | 27 | .494 | Yes |
| Root length | Soil treatment | .964 | 27 | .478 | Yes |
| Cow manure | .988 | 27 | .988 | Yes |
| Vermicompost | .981 | 27 | .900 | Yes |
| Mix manure | .960 | 27 | .364 | Yes |
| Abover ground biomass | Soil treatment | .964 | 27 | .476 | Yes |
| Cow manure | .935 | 27 | .103 | Yes |
| Vermicompost | .946 | 27 | .182 | Yes |
| Mix manure | .954 | 27 | .271 | Yes |
| Root biomass | Soil treatment | .975 | 27 | .754 | Yes |
| Cow manure | .927 | 27 | .066 | Yes |
| Vermicompost | .971 | 27 | .641 | Yes |
| Mix manure | .964 | 27 | .456 | Yes |
| Total biomass | Soil treatment | .975 | 27 | .763 | Yes |
| Cow manure | .941 | 27 | .141 | Yes |
| Vermicompost | .957 | 27 | .344 | Yes |
| Mix manure | .934 | 27 | .087 | Yes |
| Leaf area | Soil treatment | .964 | 27 | .481 | Yes |
| Cow manure | .976 | 27 | .782 | Yes |
| Vermicompost | .969 | 27 | .607 | Yes |
| Mix manure | .943 | 27 | .142 | Yes |
| Mycorrhizal infection | Soil treatment | 0.921 | 27 | .060 | Yes |
| Cow manure | 0.71 | 27 | .000 | No |
| Vermicompost | 0.705 | 27 | .000 | No |
| Mix manure | 0.381 | 27 | .000 | No |
